# Supplementary material for: ACE-inhibitory and antioxidant peptides from coconut cake albumin hydrolysates: purification, identification and synthesis
Source: Royal Society of Chemistry journal article supplement (doi:10.1039/c8ra10269d), 2019-01-01
Supplement: c8ra10269d1.pdf [file c8ra10269d1.pdf]

## Data article

**Title:** *ACE-inhibitory and antioxidant peptides from coconut cake albumin hydrolysates: Purification, identification and synthesis*

**Authors:** Yajun Zheng, Yan Li, Guifeng Li

**Affiliations:** <sup>a</sup> *College of Food Science, Shanxi Normal University, Linfen, 041004, China*

<sup>b</sup> *College of Life Sciences and Food Engineering of Hebei Engineering University, Handan, 056038, China*

**Contact email:** [zyj\\_coconut@163.com](mailto:zyj_coconut@163.com)

### Abstract

The data presented in this article are related to the research article entitled "Purification and identification of ACE-inhibitory and antioxidant peptides from coconut cake albumin hydrolysates". This article describes the Purification, identification and synthesis of ACE-inhibitory and antioxidant peptides from coconut cake albumin hydrolysate. The field data set is made publicly available to the potential re-use of coconut cake or other plants by-products.

### Specifications Table

|                            |                                                                                                                                                                                                                                                                                                                                                                                                                                                                                                                                      |
|----------------------------|--------------------------------------------------------------------------------------------------------------------------------------------------------------------------------------------------------------------------------------------------------------------------------------------------------------------------------------------------------------------------------------------------------------------------------------------------------------------------------------------------------------------------------------|
| Subject area               | <i>Physics, Chemistry, Biology</i>                                                                                                                                                                                                                                                                                                                                                                                                                                                                                                   |
| More specific subject area | <i>Identification and bioactivity of food-derived peptides</i>                                                                                                                                                                                                                                                                                                                                                                                                                                                                       |
| Type of data               | <i>Table, text file, graph, figure</i>                                                                                                                                                                                                                                                                                                                                                                                                                                                                                               |
| How data was acquired      | <i>Survey(a Varioskan Flash, Thermo Scientific, USA; a HPP-L3 high-pressure apparatus, Tianjin HuaTaiSenMiao Biotechnology Co. Ltd., China), Mass spectroscopy (a LC-MS/MS with a coupled Eksigent Nano LC, Eksigent Technologies, Dublin, CA, USA, and Thermo LTQ linear ion trap mass spectrometer, Thermo Fisher, San Jose, CA, USA), Peptides synthesized (a solid phase procedure with a Liberty microwave peptide synthesizer, Mathews, NC, USA; a Kromasil 100-5 C<sub>18</sub> column (4.6×250 mm; particle size 5 μm)).</i> |
| Data format                | <i>Raw, filtered</i>                                                                                                                                                                                                                                                                                                                                                                                                                                                                                                                 |
| Experimental factors       | <i>CCA, albumin extraction from defatted coconut cake; CCAH, coconut cake albumin hydrolyzed by four different enzymes in the following sequence: alcalase, flavourzyme, pepsin and trypsin.</i>                                                                                                                                                                                                                                                                                                                                     |
| Experimental features      | <i>Bioactivity peptides was isolated and identified from coconut cake albumin hydrolysates, and their ACE-inhibitory and antioxidant activity, effect on intracellular endothelin-1 content and cell oxidative stress were measured.</i>                                                                                                                                                                                                                                                                                             |
| Data source location       | <i>China</i>                                                                                                                                                                                                                                                                                                                                                                                                                                                                                                                         |
| Data accessibility         | <i>The data are available with this article</i>                                                                                                                                                                                                                                                                                                                                                                                                                                                                                      |

### Value of the data

- *The data provide the potential re-use of coconut cake or other plants by-products.*
- *The data provide information on how to isolate and identify bioactive peptides from coconut cake albumin.*
- *This data allows other researchers to extend the statistical analyses*

### Data

Development of nutraceuticals or functional foods would be a low-cost alternative to conventional synthetic therapeutics which always has possible harmful side effects. Food derived bioactive peptides ACE-inhibitory and antioxidant activity receiving more interest [1]. Though some bioactive peptides have been identified from coconut water and globulin, bioactive peptide from coconut cake albumin has not been reported, which limited the usage of coconut cake in functional food or other industries [2, 3]. Previous study found that coconut albumin demonstrated considerable antioxidant and ACE inhibition activity [4]. Thus we investigated the purification, identification and synthesis of ACE-inhibitory and antioxidant peptides from coconut albumin. Moreover, the inhibition modality on ACE, stability against gastrointestinal enzymes, effect on intracellular endothelin-1 content, and ability on protecting vascular endothelial cells from reactive oxygen species mediated damage were also measured.

The RP-HPLC chromatography profiles and mass spectra of the bioactive peptides are shown in Figures 1-6.

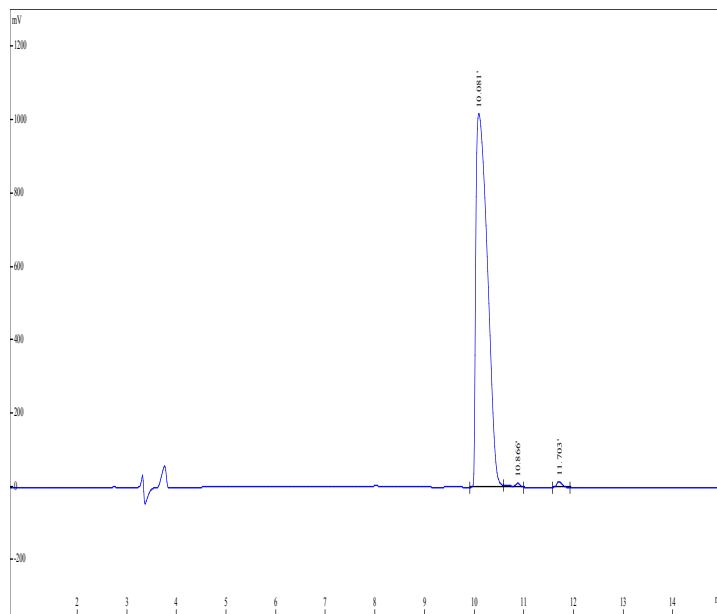

Fig. 1 The RP-HPLC chromatography profiles of identified peptide KAQYPYV

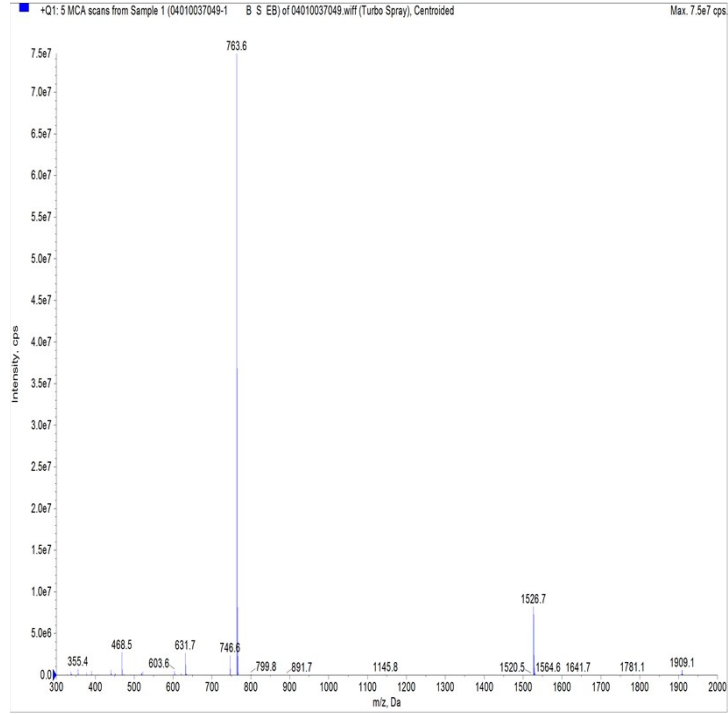

Fig. 2 The MS/MS analysis of identified peptide KAQYPYV

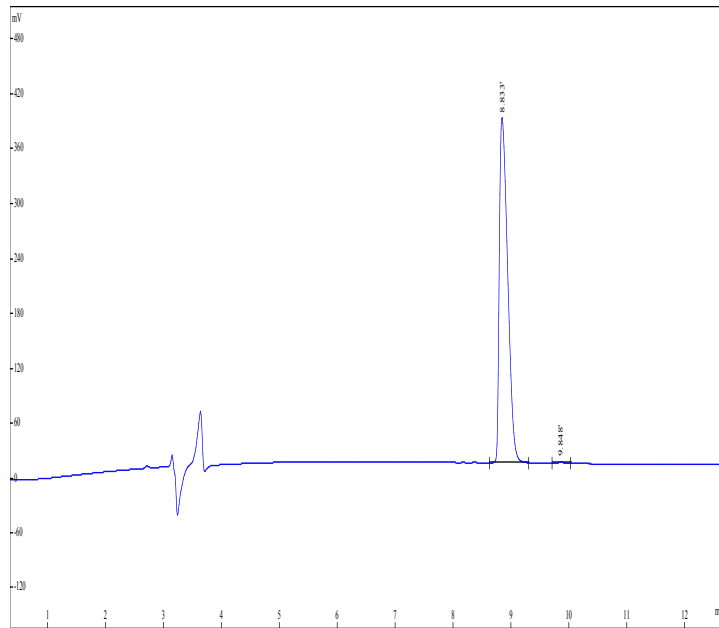

Fig. 3 The RP-HPLC chromatography profiles of KAQYPYV

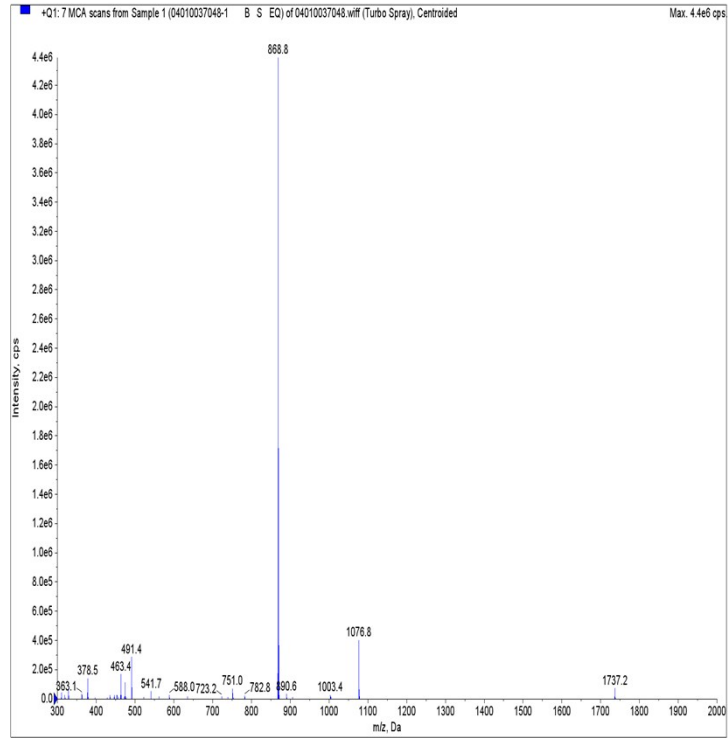

Fig. 4 MS/MS analysis of KIIIYN

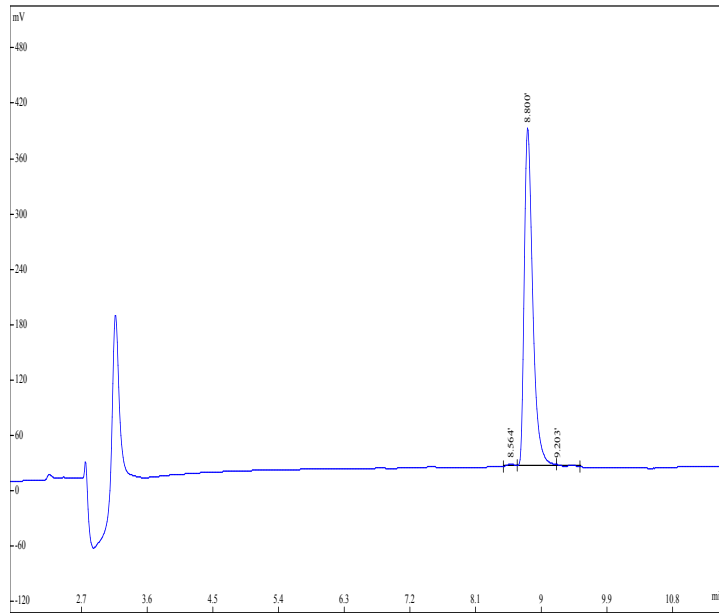

Fig. 5 The RP-HPLC chromatography profiles of KILIYG

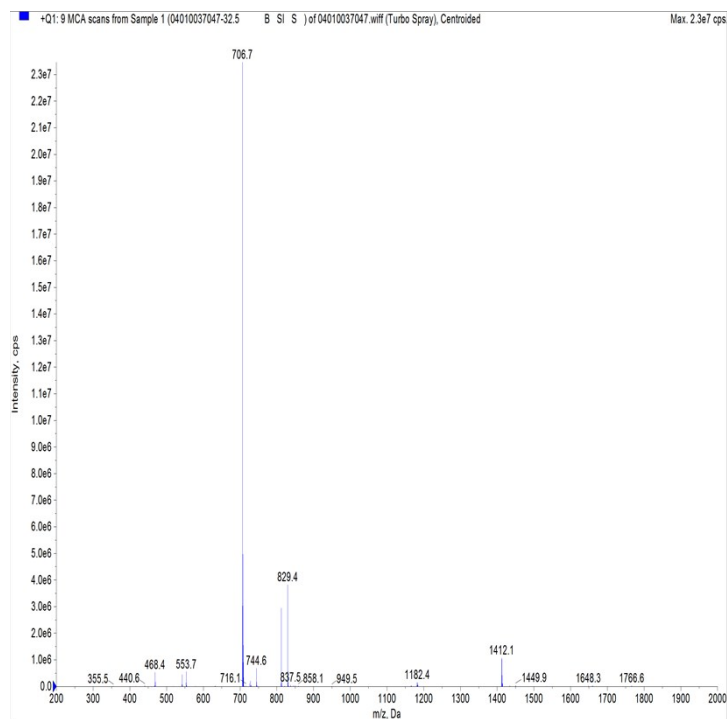

Fig. 6 MS/MS analysis of KILIYG

The data references to the purification, ACE-inhibitory activity, antioxidant ability, effect on intracellular endothelin-1 content, protection on vascular endothelial cells against oxidative damage, and stability against gastrointestinal enzymes can be seen in Table 1-8.

Table 1 Data on the Sephadex G-25 gel chromatography analysis of CCAH-III

| Elution time (min) | Absorbance at 220 nm |
|--------------------|----------------------|
| 5                  | 0.001                |
| 10                 | 0.001                |
| 15                 | 0.001                |
| 20                 | 0.001                |
| 25                 | 0.001                |
| 30                 | 0.005                |
| 35                 | 0.017                |
| 40                 | 0.256                |
| 45                 | 0.879                |
| 50                 | 0.81                 |
| 55                 | 0.632                |
| 60                 | 0.876                |
| 65                 | 1.378                |
| 70                 | 1.262                |
| 75                 | 1.074                |
| 80                 | 0.895                |
| 85                 | 0.872                |

|     |       |
|-----|-------|
| 90  | 1.045 |
| 95  | 2.603 |
| 100 | 2.588 |
| 105 | 2.422 |
| 110 | 1.228 |
| 115 | 1.042 |
| 120 | 0.916 |
| 125 | 0.808 |
| 130 | 0.74  |
| 135 | 0.688 |
| 140 | 0.676 |
| 145 | 0.645 |
| 150 | 0.544 |
| 155 | 0.356 |
| 160 | 0.184 |
| 165 | 0.11  |
| 170 | 0.075 |
| 175 | 0.069 |
| 180 | 0.065 |
| 185 | 0.058 |
| 190 | 0.048 |
| 195 | 0.04  |
| 200 | 0.035 |
| 205 | 0.032 |
| 210 | 0.029 |
| 215 | 0.026 |
| 220 | 0.024 |
| 225 | 0.025 |
| 230 | 0.026 |
| 235 | 0.032 |
| 240 | 0.039 |
| 245 | 0.048 |
| 250 | 0.056 |
| 255 | 0.061 |
| 260 | 0.062 |
| 265 | 0.06  |
| 270 | 0.057 |
| 275 | 0.039 |
| 280 | 0.031 |
| 285 | 0.023 |
| 290 | 0.019 |
| 295 | 0.016 |

|     |       |
|-----|-------|
| 300 | 0.015 |
| 305 | 0.014 |
| 310 | 0.012 |
| 315 | 0.01  |
| 320 | 0.009 |
| 325 | 0.007 |
| 330 | 0.006 |
| 335 | 0.005 |
| 340 | 0.006 |
| 345 | 0.004 |
| 350 | 0.004 |
| 355 | 0.004 |
| 360 | 0.004 |
| 365 | 0.004 |
| 370 | 0.004 |
| 375 | 0.004 |
| 380 | 0.004 |
| 385 | 0.004 |
| 390 | 0.004 |
| 395 | 0.004 |
| 400 | 0.004 |
| 405 | 0.007 |
| 410 | 0.017 |
| 415 | 0.011 |
| 420 | 0.009 |
| 425 | 0.01  |
| 430 | 0.012 |
| 435 | 0.012 |
| 440 | 0.012 |
| 445 | 0.012 |
| 450 | 0.011 |
| 455 | 0.011 |
| 460 | 0.01  |
| 465 | 0.005 |
| 470 | 0.004 |
| 475 | 0.004 |
| 480 | 0.004 |
| 485 | 0.004 |
| 490 | 0.004 |
| 495 | 0.004 |
| 500 | 0.004 |

Table 2 Data on the Sephadex G-25 gel chromatography analysis of Fraction A

| Elution time (min) | Absorbance at 220 nm |
|--------------------|----------------------|
| 5                  | 0.003                |
| 10                 | 0.003                |
| 15                 | 0.003                |
| 20                 | 0.005                |
| 25                 | 0.004                |
| 30                 | 0.013                |
| 35                 | 0.005                |
| 40                 | 0.253                |
| 45                 | 1.232                |
| 50                 | 1.481                |
| 55                 | 1.14                 |
| 60                 | 0.853                |
| 65                 | 0.727                |
| 70                 | 0.614                |
| 75                 | 0.545                |
| 80                 | 0.589                |
| 85                 | 0.613                |
| 90                 | 0.522                |
| 95                 | 0.458                |
| 100                | 0.451                |
| 105                | 0.466                |
| 110                | 0.477                |
| 115                | 0.438                |
| 120                | 0.544                |
| 125                | 0.78                 |
| 130                | 1.811                |
| 135                | 1.218                |
| 140                | 0.329                |
| 145                | 0.309                |
| 150                | 0.408                |
| 155                | 0.508                |
| 160                | 0.516                |
| 165                | 0.434                |
| 170                | 0.301                |
| 175                | 0.187                |
| 180                | 0.115                |
| 185                | 0.088                |
| 190                | 0.061                |
| 195                | 0.052                |
| 200                | 0.049                |



|     |       |
|-----|-------|
| 205 | 0.039 |
| 210 | 0.039 |
| 215 | 0.036 |
| 220 | 0.037 |
| 225 | 0.061 |
| 230 | 0.074 |
| 235 | 0.102 |
| 240 | 0.141 |
| 245 | 0.172 |
| 250 | 0.187 |
| 255 | 0.194 |
| 260 | 0.174 |
| 265 | 0.141 |
| 270 | 0.109 |
| 275 | 0.07  |
| 280 | 0.044 |
| 285 | 0.025 |
| 290 | 0.018 |
| 295 | 0.01  |
| 300 | 0.011 |
| 305 | 0.012 |
| 310 | 0.01  |
| 315 | 0.007 |
| 320 | 0.018 |
| 325 | 0.016 |
| 330 | 0.017 |
| 335 | 0.019 |
| 340 | 0.012 |
| 345 | 0.017 |
| 350 | 0.013 |
| 355 | 0.023 |
| 360 | 0.017 |
| 365 | 0.006 |
| 370 | 0.007 |
| 375 | 0.01  |
| 380 | 0.004 |
| 385 | 0.006 |
| 390 | 0.026 |
| 395 | 0.016 |
| 400 | 0.027 |
| 405 | 0.019 |
| 410 | 0.014 |

|     |       |
|-----|-------|
| 415 | 0.021 |
| 420 | 0.013 |
| 425 | 0.012 |
| 430 | 0.023 |
| 435 | 0.021 |
| 440 | 0.02  |
| 445 | 0.029 |
| 450 | 0.027 |
| 455 | 0.03  |
| 460 | 0.029 |
| 465 | 0.02  |
| 470 | 0.026 |
| 475 | 0.019 |
| 480 | 0.021 |
| 485 | 0.021 |
| 490 | 0.021 |
| 495 | 0.022 |
| 500 | 0.015 |

Table 3 Data on the ACE inhibition and hydroxyl radical scavenging activity of CCAH fractions

| Fractions | ·OH scavenging activity |       |       | ACE inhibition activity |           |          |
|-----------|-------------------------|-------|-------|-------------------------|-----------|----------|
|           | Absorbance at 532 nm    |       |       | Absorbance at 228 nm    |           |          |
| control   | 0.083                   | 0.083 | 0.083 | 1.539                   | 1.54      | 1.433    |
| CCAHA     | 0.043                   | 0.054 | 0.054 | 0.783                   | 0.827     | 0.781    |
| P1        | 0.065                   | 0.073 | 0.076 | 1.633                   | 1.676     | 1.745    |
| P2        | 0.075                   | 0.078 | 0.078 | 0.947                   | 0.973     | 1.099    |
| P3        | 0.071                   | 0.068 | 0.072 | 1.051                   | 1.047     | 1.175    |
| VE        | 0.012                   | 0.011 | 0.01  | -                       | -         | -        |
| BHT       | 0.017                   | 0.021 | 0.018 | -                       | -         | -        |
| control   | 0.696                   | 0.721 | 0.704 | 0.340276                | 0.3624346 | 0.349756 |
| A1        | 0.344                   | 0.355 | 0.295 | 0.220696                | 0.256806  | 0.204878 |
| A2        | 0.294                   | 0.307 | 0.266 | 0.100072                | 0.092696  | 0.119056 |
| A3        | 0.279                   | 0.229 | 0.306 | 0.171651                | 0.19113   | 0.172653 |
| A4        | 0.152                   | 0.117 | 0.098 | 0.060696                | 0.060306  | 0.077378 |
| A5        | 0.242                   | 0.209 | 0.198 | 0.222272                | 0.203269  | 0.194015 |
| A6        | 0.152                   | 0.181 | 0.183 | 0.090192                | 0.101562  | 0.113298 |
| control   | 0.592                   | 0.562 | 0.649 | 0.398737                | 0.424784  | 0.409844 |
| A4a       | 0.084                   | 0.065 | 0.085 | 0.086328                | 0.076663  | 0.096303 |
| A4b       | 0.158                   | 0.071 | 0.083 | 0.120554                | 0.143046  | 0.081364 |
| A4c       | 0.296                   | 0.311 | 0.277 | 0.233285                | 0.202592  | 0.189146 |
| A4d       | 0.161                   | 0.107 | 0.098 | 0.087778                | 0.103931  | 0.130912 |

|         |       |       |       |          |          |          |
|---------|-------|-------|-------|----------|----------|----------|
| A4e     | 0.088 | 0.051 | 0.054 | 0.051592 | 0.065778 | 0.051262 |
| A4f     | 0.122 | 0.171 | 0.223 | 0.078792 | 0.085061 | 0.101216 |
| A4g     | 0.106 | 0.096 | 0.127 | 0.182465 | 0.125903 | 0.146755 |
| A4h     | 0.344 | 0.284 | 0.319 | 0.260563 | 0.227617 | 0.222179 |
| A4i     | 0.123 | 0.121 | 0.197 | 0.066872 | 0.062695 | 0.119966 |
| control | 0.726 | 0.748 | 0.728 | 0.483489 | 0.469599 | 0.417666 |
| A4e-1   | 0.268 | 0.244 | 0.183 | 0.153695 | 0.185409 | 0.127906 |
| A4e-2   | 0.211 | 0.237 | 0.141 | 0.282649 | 0.299518 | 0.333693 |
| A4e-3   | 0.044 | 0.084 | 0.059 | 0.050584 | 0.053257 | 0.070055 |

“-” in the Table meant not measured

Table 4 Data on the stability against gastrointestinal enzymes of the identified peptides

| Peptides | Concentration<br>( $\mu\text{g/mL}$ ) | $\cdot\text{OH}$ scavenging activity |       |       | Concentration<br>( $\mu\text{g/mL}$ ) | ACE inhibition activity |           |          |
|----------|---------------------------------------|--------------------------------------|-------|-------|---------------------------------------|-------------------------|-----------|----------|
|          |                                       | Absorbance at 532nm                  |       |       |                                       | Absorbance at 228nm     |           |          |
| Control  |                                       | 0.546                                | 0.583 | 0.622 |                                       | 1.220106                | 1.292511  | 1.189746 |
| KAQYPYV  | 40                                    | 0.432                                | 0.408 | 0.412 | 20                                    | 0.88957                 | 0.902069  | 0.879336 |
|          | 60                                    | 0.321                                | 0.312 | 0.274 | 30                                    | 0.714705                | 0.660946  | 0.655298 |
|          | 80                                    | 0.258                                | 0.212 | 0.215 | 40                                    | 0.458702                | 0.450734  | 0.482001 |
|          | 100                                   | 0.142                                | 0.165 | 0.167 | 50                                    | 0.321167                | 0.325474  | 0.285477 |
|          | 120                                   | 0.079                                | 0.078 | 0.097 | 60                                    | 0.127333                | 0.128352  | 0.139218 |
| Control  |                                       | 0.597                                | 0.635 | 0.649 |                                       | 1.220106                | 1.292511  | 1.189746 |
| KIIINY   | 40                                    | 0.391                                | 0.345 | 0.399 | 20                                    | 0.847992                | 0.758215  | 0.854685 |
|          | 60                                    | 0.285                                | 0.275 | 0.251 | 30                                    | 0.717006                | 0.760946  | 0.722524 |
|          | 80                                    | 0.128                                | 0.118 | 0.114 | 40                                    | 0.510616                | 0.498853  | 0.478894 |
|          | 100                                   | 0.077                                | 0.064 | 0.055 | 50                                    | 0.325418                | 0.2353987 | 0.355244 |
|          | 120                                   | 0.035                                | 0.044 | 0.047 | 60                                    | 0.168798                | 0.172404  | 0.148127 |
| Control  |                                       | 0.625                                | 0.645 | 0.599 |                                       | 1.220106                | 1.292511  | 1.189746 |
| KILYIG   | 40                                    | 0.445                                | 0.349 | 0.381 | 20                                    | 0.858833                | 0.809832  | 0.809837 |
|          | 60                                    | 0.337                                | 0.316 | 0.281 | 30                                    | 0.613402                | 0.655745  | 0.679703 |
|          | 80                                    | 0.222                                | 0.192 | 0.192 | 40                                    | 0.430348                | 0.469446  | 0.491038 |
|          | 100                                   | 0.107                                | 0.093 | 0.109 | 50                                    | 0.199198                | 0.224492  | 0.232894 |
|          | 120                                   | 0.074                                | 0.051 | 0.062 | 60                                    | 0.041529                | 0.049795  | 0.048389 |

Table 5 Data on protection of the identified peptides on EA.hy926 cells against damage induce by H<sub>2</sub>O<sub>2</sub>

| Peptides                      | Concentration | Absorbance at 490 nm |           |           |           |           |           |
|-------------------------------|---------------|----------------------|-----------|-----------|-----------|-----------|-----------|
| Blank                         |               | 0.260276             | 0.2824346 | 0.269756  | 0.280276  | 0.2824346 | 0.279756  |
| H <sub>2</sub> O <sub>2</sub> | 300 μM        | 0.1428288            | 0.1555686 | 0.1249328 | 0.1365688 | 0.1345328 | 0.1294808 |
| KAQYPYV                       | 1.0 mg/mL     | 0.1779511            | 0.1843683 | 0.1856852 | 0.1896438 | 0.1763766 | 0.1817581 |
|                               | 1.5 mg/mL     | 0.2133292            | 0.2114304 | 0.1978918 | 0.2223292 | 0.1992182 | 0.2044804 |
|                               | 2.0 mg/mL     | 0.2217424            | 0.2170194 | 0.2026042 | 0.2190016 | 0.2190016 | 0.2096194 |
| KIIINY                        | 1.0 mg/mL     | 0.1721683            | 0.1656851 | 0.1779511 | 0.1643683 | 0.1756852 | 0.1740511 |
|                               | 1.5 mg/mL     | 0.2091096            | 0.2006037 | 0.1999778 | 0.2053032 | 0.1895738 | 0.1951647 |
|                               | 2.0 mg/mL     | 0.2033292            | 0.2014304 | 0.1878918 | 0.2123292 | 0.2192182 | 0.2044804 |
| KILYIG                        | 1.0 mg/mL     | 0.1541518            | 0.155339  | 0.1538658 | 0.1483658 | 0.1431518 | 0.1653303 |
|                               | 1.5 mg/mL     | 0.1885456            | 0.1726633 | 0.1717545 | 0.1670633 | 0.1741634 | 0.1741637 |
|                               | 2.0 mg/mL     | 0.2032348            | 0.2050555 | 0.1964348 | 0.2035876 | 0.1899876 | 0.1975528 |
| Captopril                     | 1.0 mg/mL     | 0.2534414            | 0.2606581 | 0.2487011 | 0.2641801 | 0.2538023 | 0.2566712 |

Table 6 Data on superoxide radical scavenging activity of the identified peptides

| Time (min) | Absorbance at 320 nm |       |         |       |       |        |       |       |        |       |       |             |       |       |       |
|------------|----------------------|-------|---------|-------|-------|--------|-------|-------|--------|-------|-------|-------------|-------|-------|-------|
|            | Control              |       | KAQYPYV |       |       | KIIINY |       |       | KILYIG |       |       | Glutathione |       |       |       |
| 0          | 0.041                | 0.041 | 0.041   | 0.059 | 0.069 | 0.064  | 0.06  | 0.056 | 0.059  | 0.057 | 0.067 | 0.08        | 0.068 | 0.066 | 0.041 |
| 0.5        | 0.071                | 0.072 | 0.071   | 0.091 | 0.093 | 0.092  | 0.094 | 0.086 | 0.089  | 0.088 | 0.098 | 0.108       | 0.099 | 0.095 | 0.069 |
| 1          | 0.099                | 0.102 | 0.099   | 0.121 | 0.124 | 0.121  | 0.125 | 0.115 | 0.118  | 0.119 | 0.129 | 0.136       | 0.128 | 0.125 | 0.097 |
| 1.5        | 0.127                | 0.131 | 0.127   | 0.149 | 0.154 | 0.149  | 0.157 | 0.143 | 0.145  | 0.148 | 0.158 | 0.164       | 0.156 | 0.151 | 0.124 |
| 2          | 0.154                | 0.16  | 0.154   | 0.177 | 0.182 | 0.177  | 0.186 | 0.169 | 0.172  | 0.175 | 0.186 | 0.191       | 0.182 | 0.178 | 0.150 |
| 2.5        | 0.179                | 0.185 | 0.179   | 0.203 | 0.210 | 0.200  | 0.214 | 0.195 | 0.198  | 0.202 | 0.214 | 0.217       | 0.207 | 0.203 | 0.175 |
| 3          | 0.204                | 0.211 | 0.204   | 0.230 | 0.236 | 0.223  | 0.241 | 0.219 | 0.222  | 0.227 | 0.24  | 0.24        | 0.231 | 0.228 | 0.199 |
| 3.5        | 0.228                | 0.235 | 0.228   | 0.254 | 0.262 | 0.246  | 0.267 | 0.243 | 0.247  | 0.252 | 0.266 | 0.265       | 0.255 | 0.252 | 0.223 |
| 4          | 0.251                | 0.259 | 0.251   | 0.277 | 0.286 | 0.267  | 0.291 | 0.267 | 0.271  | 0.276 | 0.29  | 0.288       | 0.278 | 0.274 | 0.246 |
| 4.5        | 0.274                | 0.282 | 0.274   | 0.299 | 0.309 | 0.288  | 0.288 | 0.291 | 0.294  | 0.299 | 0.313 | 0.310       | 0.300 | 0.297 | 0.269 |
| 5          | 0.294                | 0.304 | 0.294   | 0.321 | 0.332 | 0.308  | 0.311 | 0.312 | 0.316  | 0.321 | 0.333 | 0.332       | 0.322 | 0.312 | 0.291 |

GSH (glutathione) was used as the positive control.

Table 7 Data on chelating ability of the identified peptides

| Fractions   | Absorbance at 562 nm |       |       |
|-------------|----------------------|-------|-------|
| Control     | 0.667                | 0.611 | 0.700 |
| KAQYPYV     | 0.257                | 0.289 | 0.221 |
| KIIIYN      | 0.292                | 0.232 | 0.205 |
| KILIYG      | 0.271                | 0.154 | 0.214 |
| Glutathione | 0.213                | 0.266 | 0.172 |

Table 8 Data on the effect of the identified peptides on intracellular endothelin-1

| Peptides  | Concentration | Absorbance at 450 nm |       |       |
|-----------|---------------|----------------------|-------|-------|
| Control   |               | 80.34                | 81.66 | 78.78 |
| KAQYPYV   | 1.0 mg/mL     | 70.37                | 75.64 | 68.97 |
|           | 1.5 mg/mL     | 58.09                | 60.77 | 65.07 |
|           | 2.0 mg/mL     | 62.44                | 54.56 | 51.78 |
| KIIIYN    | 1.0 mg/mL     | 76.77                | 82.34 | 77.95 |
|           | 1.5 mg/mL     | 74.58                | 76.98 | 73.04 |
|           | 2.0 mg/mL     | 70.86                | 73.88 | 64.52 |
| KILIYG    | 1.0 mg/mL     | 78.86                | 72.88 | 71.52 |
|           | 1.5 mg/mL     | 62.09                | 60.77 | 65.07 |
|           | 2.0 mg/mL     | 62.98                | 64.66 | 56.57 |
| Captopril | 1.0 mg/mL     | 37.42                | 36.85 | 41.22 |

## Experimental Design, Materials and Methods

*In the current study, the purification, identification, synthesis, stability and bioactivity of ACE-inhibitory and antioxidant peptides from coconut albumin were studied. Firstly, coconut cake albumin hydrolysates were prepared, and then ACE-inhibitory and antioxidant peptides were isolated and identified from it by sequential ultrafiltration, Sephadex gel chromatography, RP-HPLC and LC-MS/MS. The obtained peptides were synthesized and their stability against gastrointestinal enzymes, effect on intracellular endothelin-1 content, and ability on protecting vascular endothelial cells from reactive oxygen species mediated damage were also measured.*

***The material used in this study was coconut cake obtained from South coconut food Co., Haikou, China.***

***The used methods were as follows:***

### ***1. Extraction of coconut cake albumin (CCA)***

*Coconut cake was defatted three times with n-hexane (1:10, g/mL) and dried, ground and passed through a sieve of 0.2 mm mesh. The obtained defatted coconut cake were mixed with distilled water (1:15, g/mL), stirred at 4 °C for 1 h and then the mixture was filtrated. The filtrate was collected and the residue was resuspended in distilled water and stirred at 4 °C for 1 h. This step was repeated in three times. The filtrate was pooled and centrifuged at 10000g for 30 min, the supernatant was collected,*

dialyzed against distilled water for 24 h at 4 °C. Then the dialyzation was centrifuged at 10000g for 30 min, and the supernatant was collected and lyophilized. Then CCA was obtained and stored at -20 °C.

## **2. Hydrolysis of coconut cake albumin**

The enzymatic hydrolysis of CCA was performed following the method reported by Zheng, Li, Zhang, Ruan, Zhang, & Zhang et al. [5]. The CCA solution (5 g/100 mL) was transferred into polyethylene bags, sealed under vacuum and subjected to high pressure treatment using a HPP-L3 high-pressure apparatus (Tianjin HuaTaiSenMiao Biotechnology Co. Ltd., China) at 400 MPa, 35 °C for 15 min. Then the CCA solution was hydrolyzed by four different enzymes in the following sequence: alcalase (0.5 g/ 100g protein, 45°C, pH8.5, hydrolyzed time: 2 h), flavourzyme (0.5 g/ 100g protein, 50°C, pH7.0, 2 h), pepsin (0.3 g/ 100g protein, 37°C, pH2.0, 1 h), trypsin (0.3 g/ 100g protein, 37°C, pH7.0, 1 h). Before the addition of each enzyme, the temperature and pH of reaction solution were adjusted to the values described above. At the end of the hydrolysis, the reaction solutions were incubated in 100 °C for 5 min to inactivate the enzyme, and then centrifuged at 10000g, 4 °C for 20 min. The supernatants were collected and lyophilized to obtain CCAH. The degree of hydrolysis (DH), ACE-inhibitory ability and hydroxyl radical ( $\cdot$ OH) scavenging activity of coconut cake albumin hydrolysis (CCA) were determined using the methods of Adler-Nissen [6], Jimsheena & Gowda [7] and the 2-deoxyribose oxidation method [8], respectively.

## **3. ACE-inhibitory activity and inhibition pattern**

According to the method of Jimsheena & Gowda [7], 50  $\mu$ L of sample solution, 50  $\mu$ L of ACE (25 mill units/mL) and 150  $\mu$ L of 8.3 mM HHL were mixed and incubated at 37 °C for 60 min, followed by termination of the reaction by adding 250  $\mu$ L of 1 M HCl. Then 1.4 mL of ethyl acetate was added and the mixture was vortexed for 5 sec and centrifuged at 14100g for 5 min. One mL of the upper organic phase was transferred into a test tube and placed in a vacuum oven at 80 °C for 1 h. Subsequently, 2 mL of distilled water was added and the absorbance at 228 nm was read. The  $IC_{50}$  value was defined as the concentration of inhibitor required to inhibit 50% of the ACE activity. The inhibition (%) was calculated as below:

$$ACE \text{ inhibition } (\%) = (1 - A_s/A_c) \times 100 \quad (1)$$

Where,  $A_c$  was the absorbance of the ACE solution without an inhibitor,  $A_s$  was the absorbance of mixture contained samples. Determination of the ACE inhibition pattern was carried out according to the method published by Bush, Henry, & Slusarchyk [9]. Different concentrations of ACE-inhibitory peptide (0.1, 0.2, 0.5 mg/mL) were added to each reaction mixture and the enzyme activity was measured with different concentrations of HHL (0.76, 1.52, 3.04, 3.80 and 7.60 mM). The ACE-inhibitory activity was determined and the kinetics of ACE in the presence of the inhibitor was determined by Lineweaver-Burk plots.

## **4. Scavenging activity of hydroxyl radical**

Hydroxyl radical ( $\cdot$ OH) scavenging activity was assayed using the 2-deoxyribose oxidation method [8]. 100  $\mu$ L of CCAH solution was mixed with 1.4 mL of sodium phosphate buffer (0.1 M, pH 7.4), 100  $\mu$ L of 10

mM 2-deoxyribose, 100  $\mu$ L of 10 mM FeSO<sub>4</sub>, 100  $\mu$ L of 10 mM ethylenediaminetetra acetic acid (EDTA) and 100  $\mu$ L of H<sub>2</sub>O<sub>2</sub> (10 mM). After incubation at 37 °C for 1 h, 1.0 mL of trichloroacetic acid (28 mg/mL) and 1.0 mL of 2-thiobarbituric acid (10 mg/mL) were added. Then the mixture was kept in boiling water bath for 20 min. After cooled to room temperature, the absorbance of the mixture at 532 nm was read. The activity was determined using the equation:

$$\cdot\text{OH scavenging activity (\%)} = [1 - (A_S - A_B)/A_C] \times 100 \quad (2)$$

Where  $A_B$  was the absorbance of the blank (distilled water instead of samples),  $A_C$  was the absorbance of control (without the addition of 2-deoxyribose oxidation) and  $A_S$  was the absorbance of mixture contained samples.  $IC_{50}$  was defined as the concentration of peptide that was required to scavenge 50% of radical activity.

### **5. Purification of the bioactivity peptides**

CCAH was separated by four steps in the following sequence: ultrafiltration, Sephadex G-25 gel chromatography, Sephadex G-15 gel chromatography and reversed-phase high performance liquid chromatography (RP-HPLC). Firstly, the CCAH was filtered sequentially using an ultrafiltration unit (Pellicon XL, Millipore, USA) through two ultrafiltration membranes with molecular weight (MW) cut-off of 5 and 3 kDa, respectively. Three fractions were obtained: CCAH-I with MW > 5 kDa, CCAH-II with MW 3–5 kDa and CCAH-III with MW < 3 kDa. The fraction with the highest ACE-inhibitory activity was further separated by a Sephadex G-25 gel filtration column ( $\Phi$ 2.6 cm  $\times$  60 cm) equilibrated with distilled water at 1.0 mL/min. The column was eluted with distilled water and monitored at 220 nm. Fractions were collected, lyophilized and their ACE-inhibitory activity and  $\cdot$ OH scavenging activity were measured. The fraction showing the highest ACE-inhibitory activity and/or  $\cdot$ OH scavenging activity was separated by Sephadex G-15 chromatography ( $\Phi$ 1.2 cm  $\times$  100 cm) equilibrated with distilled water at 0.8 mL/min. The column was eluted with distilled water and monitored at 220 nm. The fraction showing the highest ACE-inhibitory activity and/or  $\cdot$ OH scavenging activity was separated by RP-HPLC on a Zorbax semi-preparative C<sub>18</sub> column ( $\Phi$  9.4 mm  $\times$  250 mm, Agilent Technologies, USA), using a linear gradient of acetonitrile containing 0.1% TFA (5%–30%, in 30 min) at a flow rate of 2.5 mL/min. The fraction showing the highest ACE-inhibitory activity and/or  $\cdot$ OH scavenging activity was further isolated on a Zorbax analysis C<sub>18</sub> column ( $\Phi$  4.6 mm  $\times$  250 mm, Agilent Technologies, USA) with a linear gradient of acetonitrile containing 0.1% TFA (5%–25%, in 20 min) at a flow rate of 1.0 mL/min. The fractions with high ACE-inhibitory activity and/or antioxidant activity were rechromatographed to confirm their purity on the same analytical C<sub>18</sub> column at a flow rate of 1.0 mL/min with a linear gradient of acetonitrile containing 0.1% TFA (15%–35%, in 12 min). The fractions with high ACE-inhibitory activity and/or  $\cdot$ OH scavenging activity were subjected to LC-MS/MS analysis.

### **6. Molecular mass and amino acid sequence of the purified peptides**

Accurate amino acid sequence and molecular mass of the purified peptides were determined by LC-MS/MS with a coupled Eksigent Nano LC (Eksigent Technologies, Dublin, CA, USA) and Thermo LTQ linear ion trap mass spectrometer (Thermo Fisher, San Jose, CA, USA). The acquired MS/MS data were interpreted using the bioinformatics search engine Mascot version 2.1.0 (Matrix Sciences, London, UK).

The peptide sequences were matched to the published sequences of coconut proteins from the National Center for Biotechnology Information (NCBI, Bethesda, MD, USA) database.

## **7. Peptide synthesis**

Bioactive peptides identified in CCAH were synthesized by the solid phase procedure with a Liberty microwave peptide synthesizer (Mathews, NC, USA). Briefly, the peptides were analyzed with a Kromasil 100-5 C<sub>18</sub> column (4.6×250 mm; particle size 5 μm) eluted with mobile phase consisting of 0.1% TFA in water and 0.1% TFA in acetonitrile. The purity and molecular mass of the synthetic peptides were determined by Liquid Chromatography coupled to Mass Spectrometry.

## **8. Stability of the synthetic peptides**

Peptide solutions were adjusted to pH 2.0, mixed with pepsin (E/S = 1:35) and incubated at 37 °C for 1 h. Afterwards, the reaction mixture was adjusted to pH 7.0, pancreatin was added (1 g/ 25g peptide) and incubated at 37 °C for 2 h, and then the digestion was terminated by boiling for 10 min. The ACE-inhibitory activity and ·OH scavenging activity of the treated synthetic peptides and the untreated synthetic peptides were determined.

## **9. Cell culture and cell viability determination**

The EA.hy926 cells were seeded in a 96-well plate at a density of  $1.0 \times 10^5$  cells mL<sup>-1</sup>, cultured in DMEM (containing 1% non-essential amino acid solution, 10% FBS, 100 IU mL<sup>-1</sup> penicillin and 100 μg mL<sup>-1</sup> streptomycin) in a humidified atmosphere of 5% CO<sub>2</sub> at 37 °C for 24 h. Then the wells were washed with phosphate buffer solution (PBS) and cultured in fresh DMEM but without FBS at 37 °C for 12 h. The DMEM without FBS was removed and the cells were cultured in DMEM at 37 °C for another 24 h. Then the cells were treated with different sample concentrations (1.0, 1.5 and 2.0 mg/ mL) for 24 h. Captopril (1 mg/mL) was used as the positive control, whereas the negative control was treated with only DMEM. Each treatment was repeated in six wells. After treatment, viability of the cells was measured using MTT method [10]. Briefly, the cells were washed with PBS and 20 μL of MTT (5 mg/ mL) were added into each well and kept at 37 °C for 4 h. Then MTT solution was removed and 100 μL of dimethyl sulfoxide were added. The absorbance was measured at 490 nm by a Varioskan Flash (Thermo Scientific, USA).

## **10. Effect on intracellular ET-1 content**

The EA.hy926 cells were seeded in a 96-well plate at a density of  $1.0 \times 10^5$  cells mL<sup>-1</sup>. After being cultured in the DMEM at 37 °C for 24 h, the cells were treated with different concentrations of test samples (1.0, 1.5 and 2.0 mg/mL) for 48 h. Captopril (1 mg/mL) was used as positive control and the negative control was treated with only DMEM. After treatment, the growth medium of each well was collected to quantify ET-1 content using the ET-1 Elisa kit following the manufacturer's instructions.

## **11. Antioxidant activity of the peptides**

### **11.1. Protective effect against H<sub>2</sub>O<sub>2</sub>-induced cellular oxidative stress**



The EA.hy926 cells were seeded in 96-well plates with  $5 \times 10^3$  cells  $\text{mL}^{-1}$  and incubated at  $37^\circ\text{C}$  in 5%  $\text{CO}_2$  for 24 h. Then the cells were treated with various concentrations of test samples (1.0, 1.5 and 2.0 mg/mL, dissolved in PBS) and incubated at  $37^\circ\text{C}$  for 24 h, followed by treatment with  $300 \mu\text{M H}_2\text{O}_2$  for another 24 h. Cell viability was determined using the MTT method as described above. In the blank control, cells were treated only with the DMEM. In the  $\text{H}_2\text{O}_2$  treated group (control group), cells were treated with  $300 \mu\text{M H}_2\text{O}_2$ . In the sample group, cells were pretreated with different concentrations of samples then exposed to  $300 \mu\text{M H}_2\text{O}_2$  [1]. The protective effect of samples against  $\text{H}_2\text{O}_2$ -induced cellular oxidative stress was calculated as follows:

$$\text{Protective ability \%} = (A_S - A_C) / (A_B - A_C) \times 100 \quad (3)$$

Where,  $A_S$  was the absorbance at 490 nm of the sample group,  $A_C$  was absorbance of the  $\text{H}_2\text{O}_2$  treated group, and  $A_B$  was the absorbance of blank control.

### 11.2. Superoxide radical-scavenging activity

According to the method of Marklund and Marklund [11],  $100 \mu\text{L}$  samples (1 mg/mL) and 3 mL of pyrogallol solution (3 mM) were mixed and the absorbance at 320 nm recorded at 30 s intervals using a spectrophotometer. The scavenging activity was determined as the percentage of inhibiting pyrogallol autoxidation, which was calculated from the absorbance at 320 nm in the presence or absence of samples. GSH (1 mg/mL) was used as comparison.

### 11.3. Metal chelating capacity

According to the method of Jeong, De Lumen, & Jeong [12],  $450 \mu\text{L}$  of sample solutions (100  $\mu\text{g}/\text{mL}$ ), 45  $\mu\text{L}$  of 2 mM  $\text{FeCl}_2$  and 1815  $\mu\text{L}$  of distilled water were mixed. The mixture was reacted with 90  $\mu\text{L}$  of 5 mM ferrozine for 30 min. Then the absorbance was read at 562 nm. GSH (100  $\mu\text{g}/\text{mL}$ ) was used as comparison and the chelating activity was calculated as follows:

$$\text{Chelating activity (\%)} = [1 - (A_S - A_B) / A_C] \times 100 \quad (4)$$

Where  $A_B$  was the absorbance of the blank,  $A_C$  was the absorbance of control (without the addition of ferrozine) and  $A_S$  was the absorbance of mixture contained samples.

### Acknowledgements

This work was supported by the key research project of Hainan province (No.ZDYF2017069).

### References

- [1] Himaya SWA, Ngo DH, Ryu B, Kim SK. An active peptide purified from gastrointestinal enzyme hydrolysate of Pacific cod skin gelatin attenuates angiotensin-1 converting enzyme (ACE) activity and cellular oxidative stress. *Food Chemistry*. 2010 132: 1872–1882.
- [2] Santana MJ, Olivera ALD, Júnior LHKQ, Mandal SM, Matos CO, Dias RD, Franco OL, Liao LM. Structural insights into Cn-AMP1, a short disulfide-free multifunctional peptide from green coconut water. *FEBS Letters*. 2015 589: 639-644.

- [3] Li Y, Zheng Y, Zhang Y, Xu J, Gao G. Antioxidant Activity of Coconut (*Cocos nucifera* L.) Protein Fractions. *Molecules*. 2018 23(3): 707.
- [4] Li Y, Zheng YJ, Zhang YL, Liu LY, Zhao SL. Purification, characterization, synthesis, in vivo and in vitro antihypertensive activity of bioactive peptides derived from coconut (*Cocos nucifera* L.) cake globulin hydrolysates. *RSC Advances*. 2016 6(95): 92688–92698.
- [5] Zheng YJ, Li Y, Zhang YL, Ruan XH, Zhang RG, Zhang YF, Zhao SL. Purification, characterization, synthesis, in vivo ACE inhibition and in vitro antihypertensive activity of bioactive peptides derived from palm kernel expeller glutelin-2 hydrolysates. *Journal of Functional Foods*. 2017 28(2): 48–58.
- [6] Adler-Nissen J. Determination of the degree of hydrolysis of food protein hydrolysates by trinitrobenzenesulfonic acid. *Journal of Agriculture and Food Chemistry*. 1979 27: 1256–1262.
- [7] Jimsheena VK, Gowda LR. Colorimetric, high-throughput assay for screening angiotensin I-converting enzyme inhibitors. *Analytical Chemistry*. 2009 81: 9388–9394.
- [8] Ren J, Zhao M, Shi J, Wang J, Jiang Y, Cui C, Kakuda Y, Xue SJ. Purification and identification of antioxidant peptides from grass carp muscle hydrolysates by consecutive chromatography and electrospray ionization-mass spectrometry. *Food Chemistry*. 2008 108: 727–736.
- [9] Bush K, Henry PR, Slusarchyk DS. Muraceins-muramyl peptides produced by *Nocardia orientalis* as angiotensin converting enzyme inhibitors. *Journal of Antibiotics*. 1984 37: 330–335.
- [10] Mosmann T. Rapid colorimetric assay for cellular growth and survival: application to proliferation and cytotoxicity assays. *Journal of immunological methods*. 1983 65: 55–63.
- [11] Marklund S, Marklund G. Involvement of the superoxide anion radical in the autoxidation of pyrogallol and a convenient assay for superoxide dismutase. *European Journal of Biochemistry*. 1974 47: 469–474.
- [12] Jeong JB, De Lumen, BO, Jeong HJ. Lunasin peptide purified from *Solanum nigrum* L. protects DNA from oxidative damage by suppressing the generation of hydroxyl radical via blocking fenton reaction. *Cancer Letter*. 2010: 293, 58–64.
